# Supplementary material
Source: Springer Nature journal article supplement (https://www.springermedizin.de/resource/supplementary/12889_2004_156_MOESM4_ESM.pdf/9500458)
Supplement: MOESM4 [file 9500458]

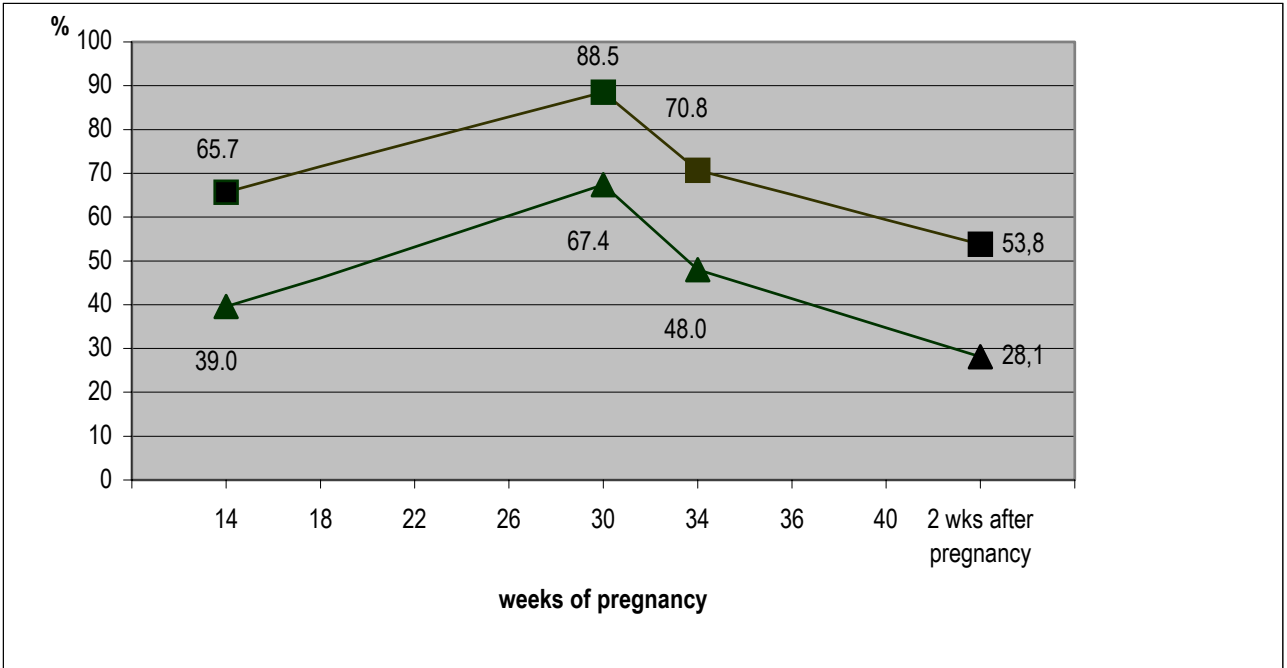

Fig. 3. The point prevalence of PPGP during pregnancy for women with ( ! ) and without ( % ) a history of LBP/ PPGP
